# Supplementary material
Source: Springer Nature journal article supplement (https://www.springermedizin.de/resource/supplementary/12903_2013_302_MOESM4_ESM.pdf/9516566)

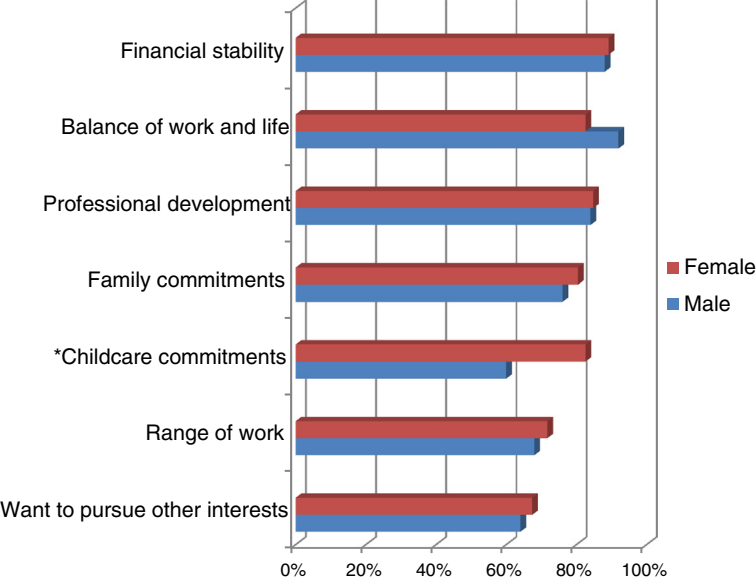

Supplement: MOESM4 [file 9516566]
